# Supplementary material for: Straw-Based Biopurification Systems to Remove Ibuprofen, Diclofenac and Triclosan from Wastewaters: Dominant Microbial Communities
Source: MDPI journal article supplement (doi:10.3390/agronomy11081507), 2021-07-29
Supplement: s1 [file s1]

Archive with 1 entries (1 files):
- agronomy-1256780-supplementary.pdf
