# Supplementary material for: Straw-Based Biopurification Systems to Remove Ibuprofen, Diclofenac and Triclosan from Wastewaters: Dominant Microbial Communities
Source: MDPI journal article supplement (doi:10.3390/agronomy11081507), 2021-07-29
Supplement: s1 [file s1 › agronomy-1256780-supplementary.pdf]

## **Supporting information**

### **Straw based biopurification systems to remove ibuprofen, diclofenac and triclosan from wastewaters: Dominant microbial communities**

#### **Authors:**

Laura Delgado-Moreno, Pieter van Dillewijn, Rogelio Nogales and Esperanza Romero<sup>1</sup>

#### **Affiliations:**

Department of Environmental Protection, Estación Experimental del Zaidín-Consejo Superior de Investigaciones Científicas (EEZ-CSIC), C/ Profesor Albareda 1, 18008 Granada, Spain.

---

<sup>1</sup>Author for correspondence: Esperanza Romero

Tel.: +34 958181600; Fax: +34 958129600;

E-mail addresses: [esperanza.romero@eez.csic.es](mailto:esperanza.romero@eez.csic.es) .

## Figure captions:

**Figure S1.** Hierarchical cluster analysis (a) and principal coordinate analysis (b) based on Euclidean distances for chemical properties of biomixtures consisting of soil, wet olive cake or alperujo and barley straw (SAS), soil, vermicompost and barley straw (SVS) and soil, peat and barley straw (SPS).

**Figure S2.** Rarefaction curves of species richness, subsampling from 250 to 10000 reads for duplicate SAS, SVS and SPS biomixtures, before contamination (BC) and at 10 and 84 days after the addition of PPCPs.

**Figure S3.** Relative abundance of the most dominant phyla (>1% in any sample) in samples of biomixtures (SAS), (SVS) and (SPS) before contamination (BC) and at 10 and 84 days after the addition of PPCPs. Filled circles indicate samples before contamination (BC), filled squares indicate T=10 days and filled triangles T=84 days after PPCP contamination

**Figure S4.** Principal coordinate analyses (PCoA) of the bacterial community structure in the biomixtures based on Bray-Curtis distances. Circles indicate samples before contamination and open squares at 10 and open diamonds at 84 days after the addition of PPCPs.

**Figure S5.** Relative abundance (%) of the most dominant bacterial classes (>1% in any sample) in the SAS, SVS and SPS biomixtures before contamination (BC) and at 10 and 84 days after the addition of the PPCPs.

**Figure S6.** Non-metric multidimensional scaling (NMDS) of the bacterial community at genus level in samples of contaminated biomixtures (SAS), (SVS) and (SPS) constrained by the most dominant genera.

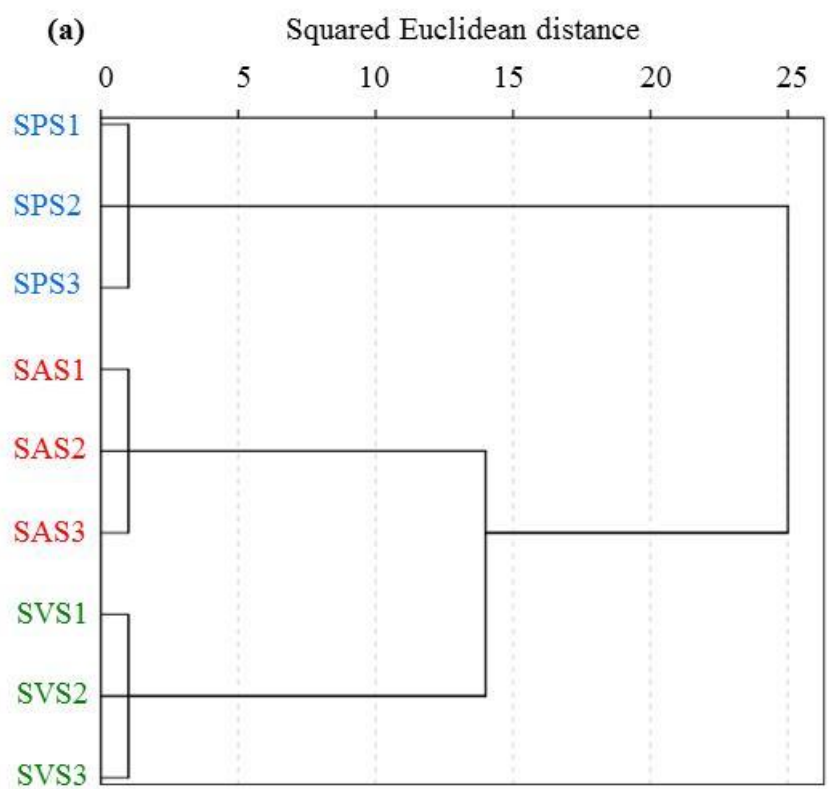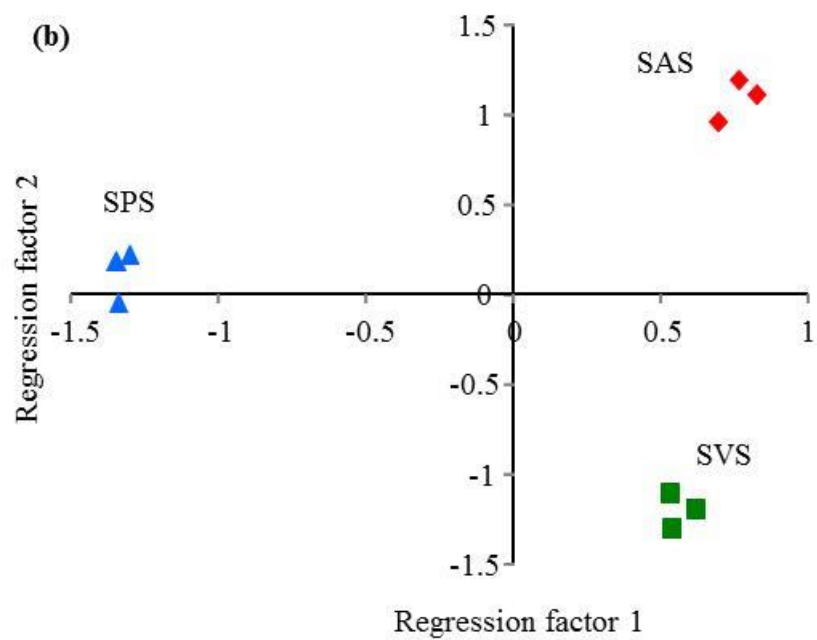

**Figure S1**

Figure S1

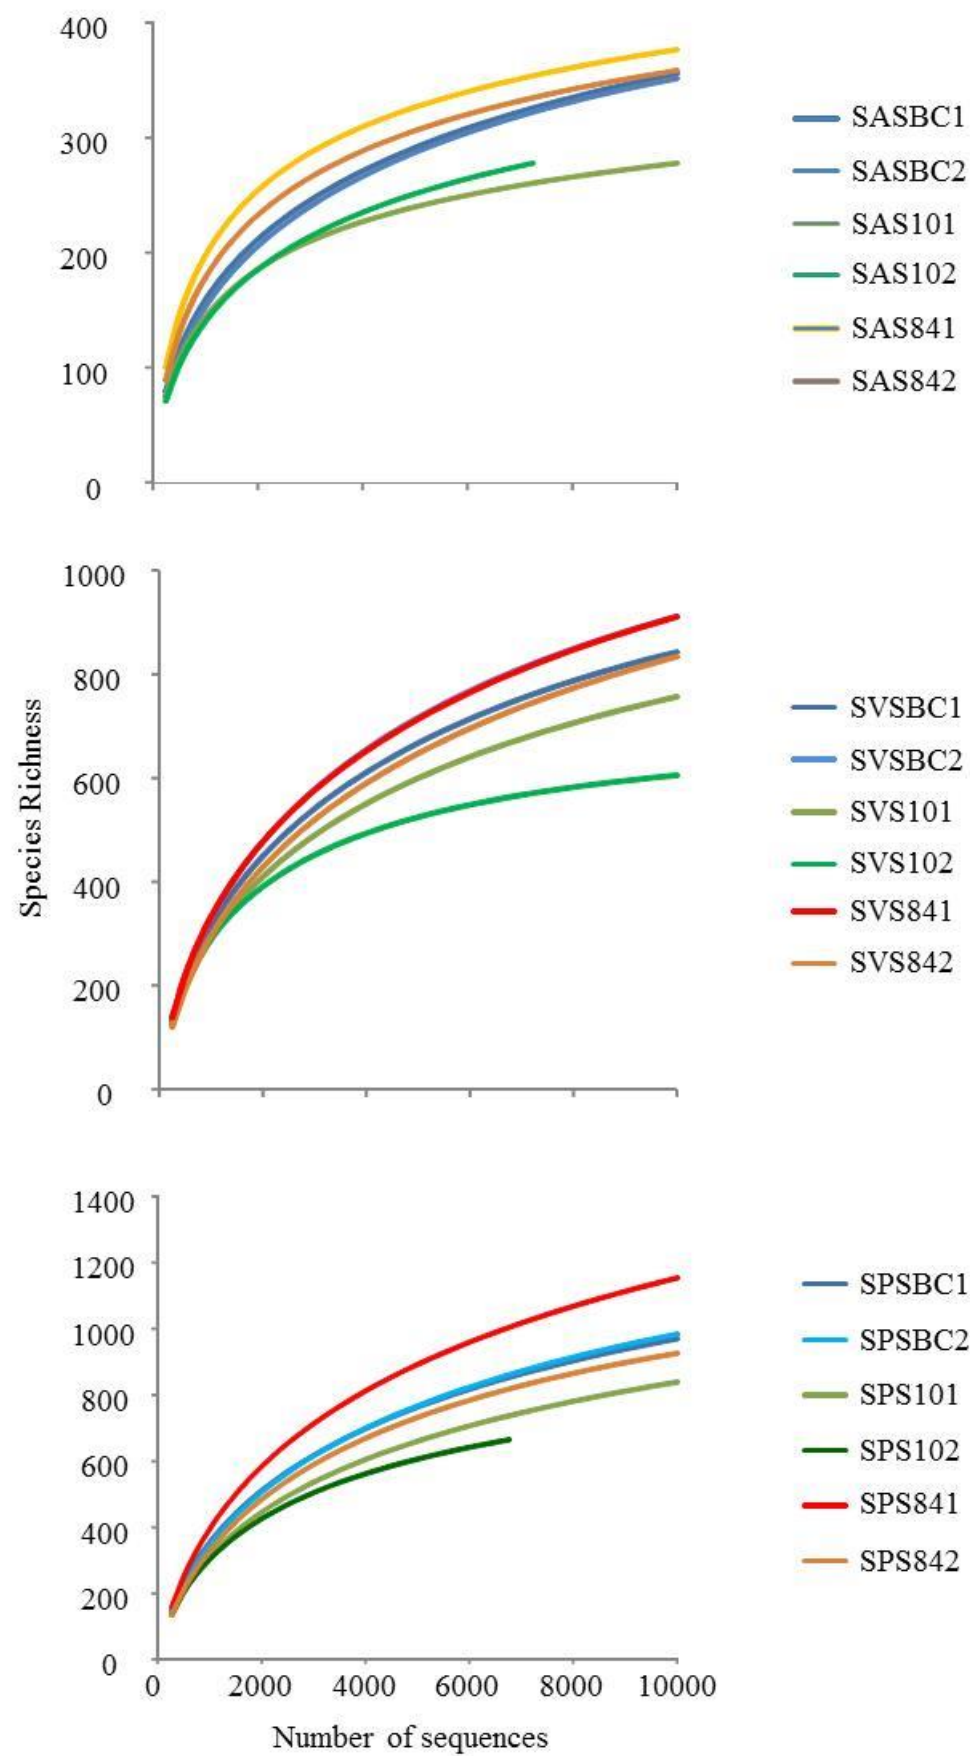

Figure S2

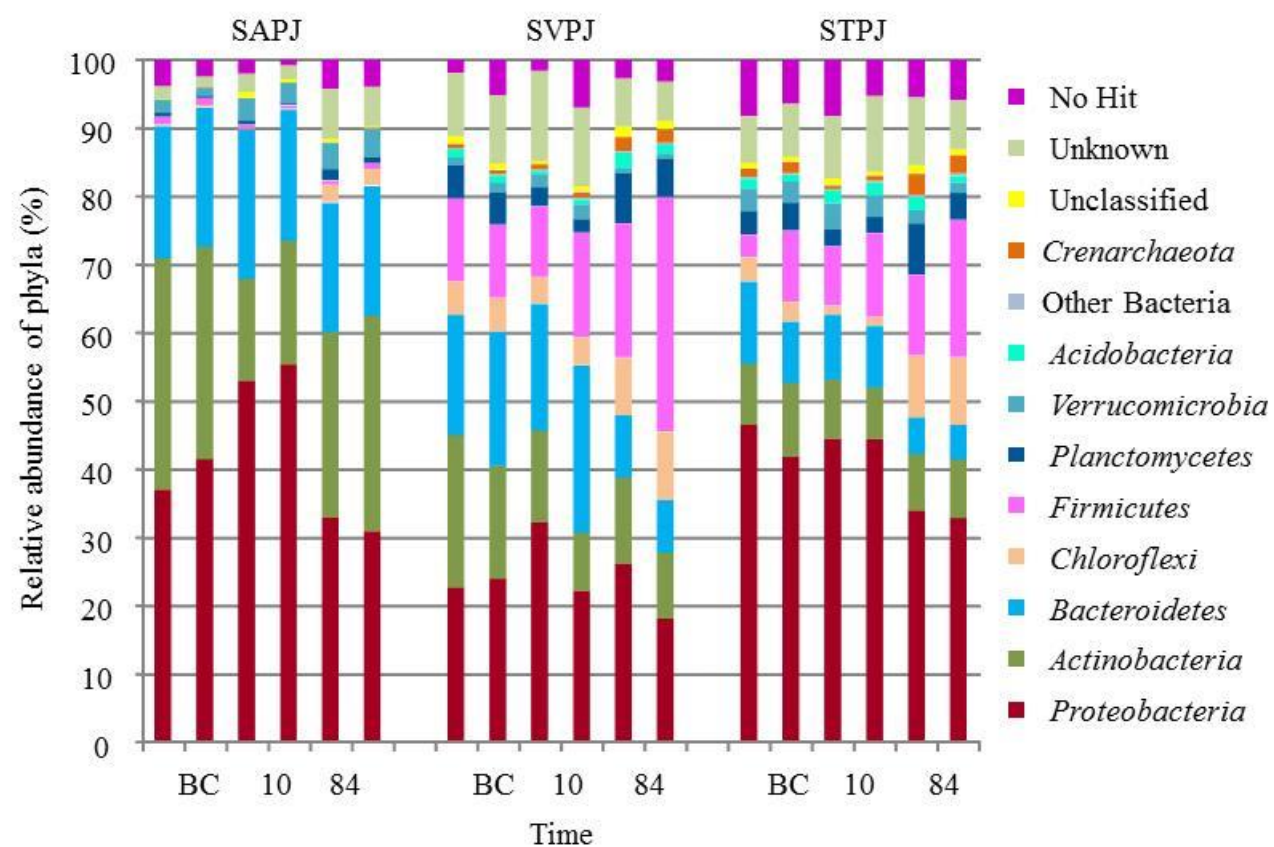

Figure S3

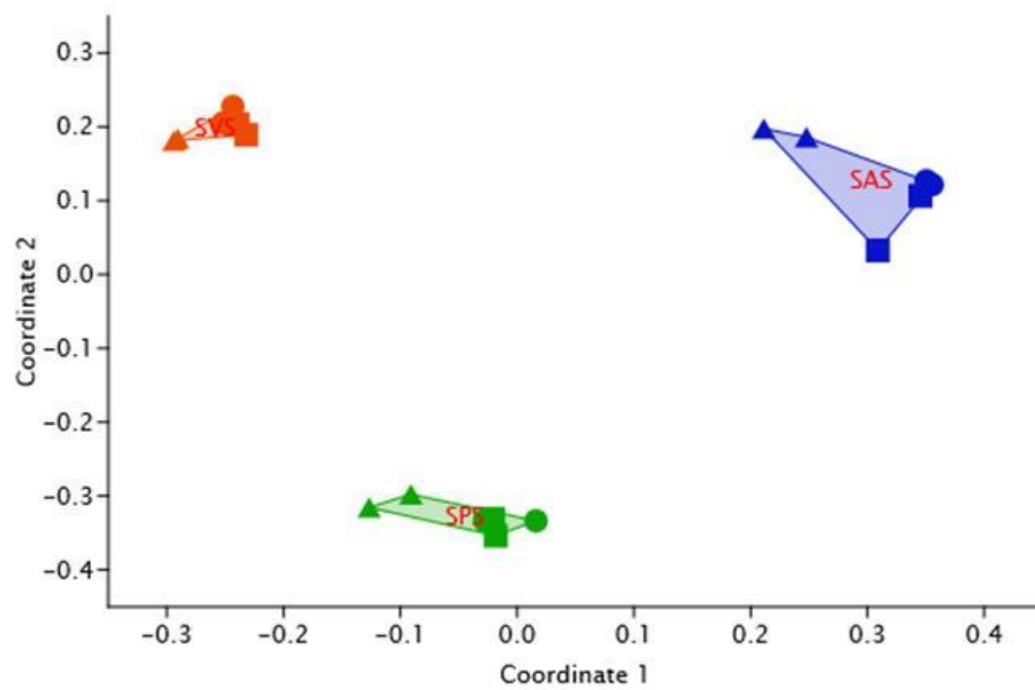

Figure S4

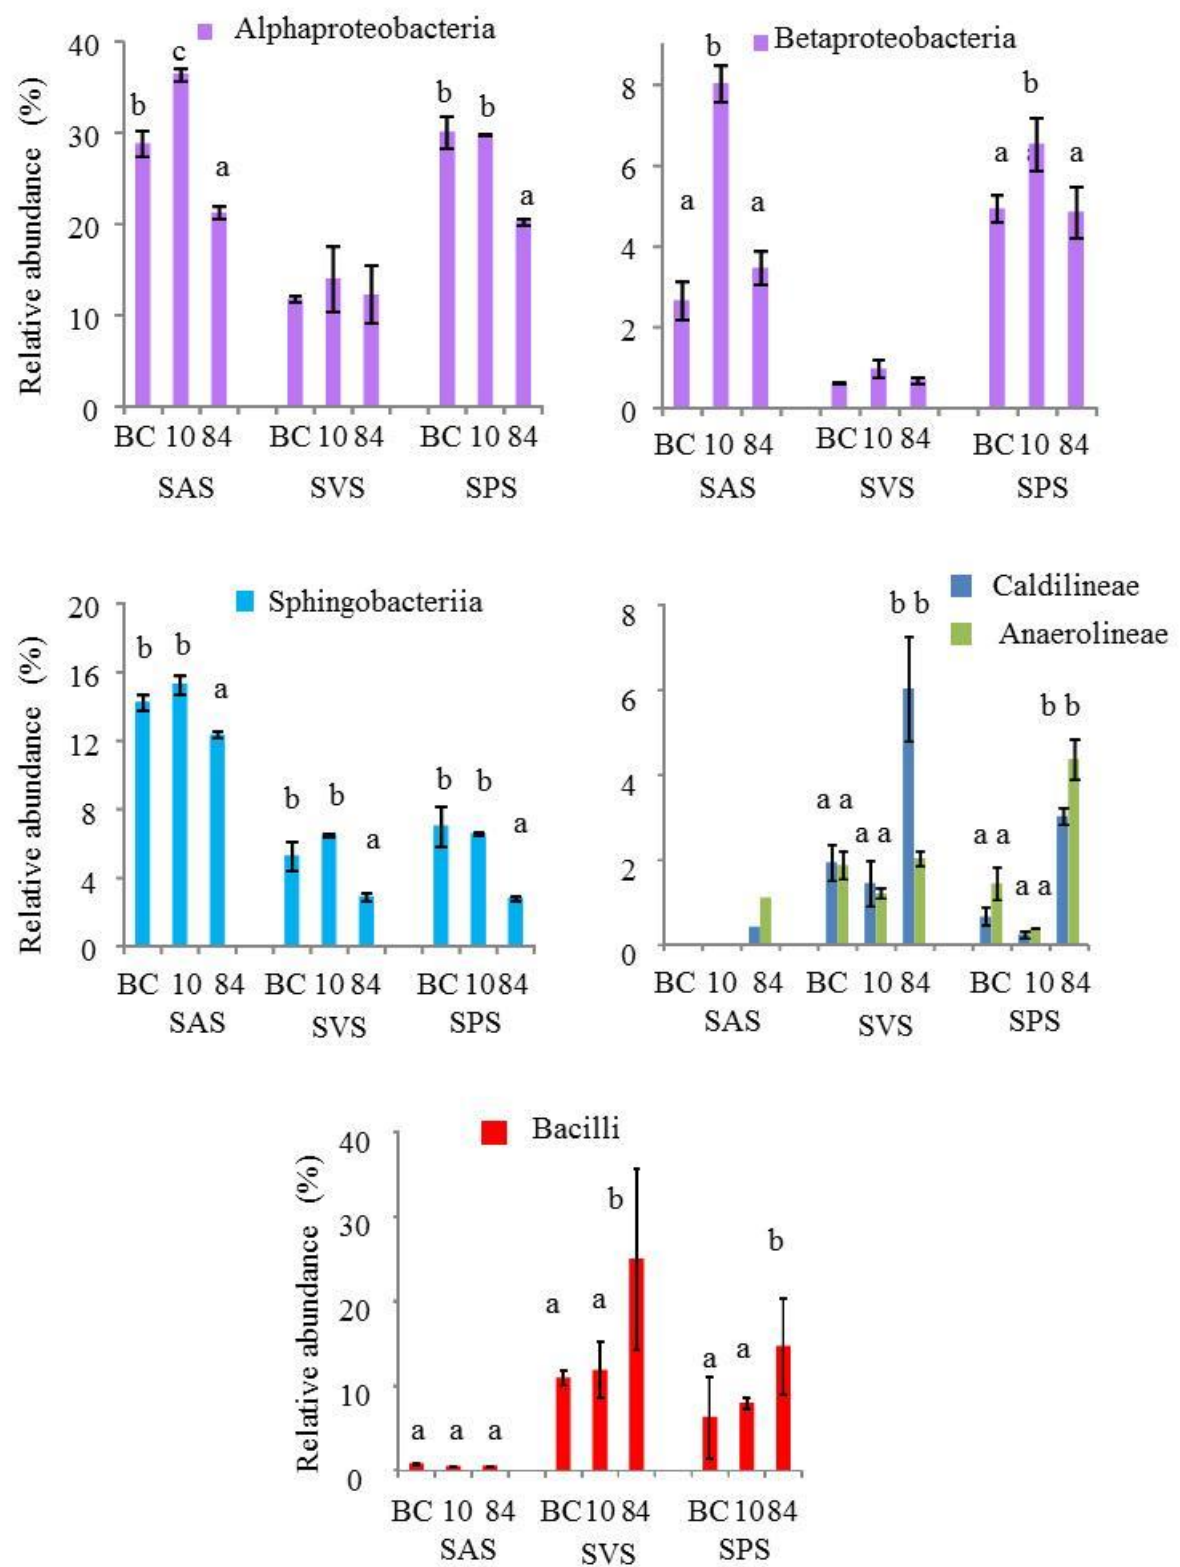

Figure S5

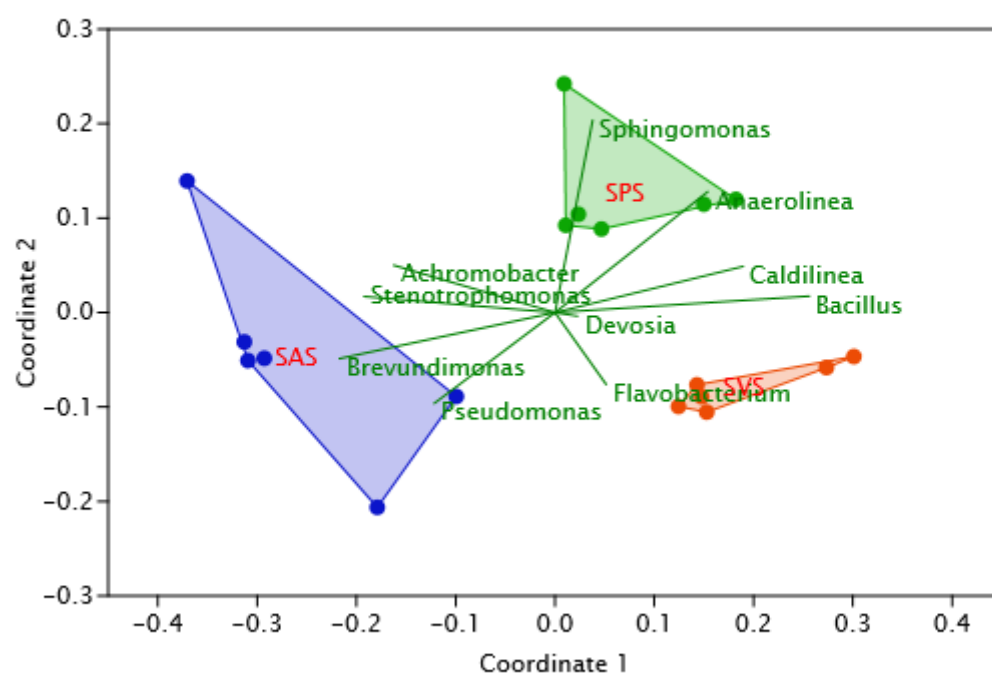

Figure S6
